1 **Safety and effectiveness of RBD-specific polyclonal equine F(ab')<sub>2</sub> fragments for the**  
2 **treatment of hospitalized patients with severe Covid-19 disease: a retrospective cohort study.**

3 **Diego H. Farizano Salazar<sup>1¶</sup>, Fernando Achinelli<sup>1¶</sup>, Mariana Colonna<sup>2</sup>, Lucía Perez<sup>3</sup>, Analía**  
4 **A. Giménez<sup>1</sup>, Maria Alejandra Ojeda<sup>1</sup>, Susana N. Miranda Puente<sup>1</sup>, Lía Sánchez Negrette<sup>1</sup>,**  
5 **Florencia Cañete<sup>1</sup>, Ornela I. Martelotte Ibarra<sup>1</sup>, Santiago Sanguinetti<sup>2</sup>, Linus Spatz<sup>2</sup>,**  
6 **Fernando A. Goldbaum<sup>2,4,5,6</sup>, Carolina Massa<sup>2</sup>, Marta Rivas<sup>2</sup>, Mariana Pichel<sup>2</sup>, Yanina**  
7 **Hiriart<sup>2,4</sup>, Vanesa Zylberman<sup>2,4</sup>, Sandra Gallego<sup>4,7</sup>, Brenda Konigheim<sup>4,7</sup>, Francisco**  
8 **Fernandez<sup>8</sup>, Matías Deprati<sup>8</sup>, Ian Roubicek<sup>2</sup>, Diego H. Giunta<sup>3,4</sup>, Esteban Nannini<sup>4,9</sup>, Gustavo**  
9 **Lopardo<sup>10,11</sup> and Waldo H. Belloso<sup>3\*</sup>, on behalf of EPIC Study Group ^.**

10 **Affiliations**

11 <sup>1.</sup> Hospital de Campaña Escuela Hogar, Corrientes, Corrientes, Argentina

12 <sup>2.</sup> Inmunova S.A., Gral. San Martín, Buenos Aires, Argentina

13 <sup>3.</sup> Department of Research, Hospital Italiano de Buenos Aires. Ciudad Autónoma de Buenos  
14 Aires, Buenos Aires, Argentina.

15 <sup>4.</sup> Consejo Nacional de Investigaciones Científicas y Técnicas (CONICET).

16 <sup>5.</sup> Fundación Instituto Leloir, IIBBA-CONICET. Ciudad Autónoma de Buenos Aires, Argentina.

17 <sup>6.</sup> CRIP - Centro de Rediseño e Ingeniería de Proteínas UNSAM Campus Miguelete. Gral. San  
18 Martín, Buenos Aires, Argentina.

19 <sup>7.</sup> Instituto de Virología Dr. José María Vanella, Universidad Nacional de Córdoba, Córdoba,  
20 Argentina.

21 <sup>8.</sup> Laboratorio Elea Phoenix S.A., Los Polvorines, Buenos Aires, Argentina

22 <sup>9.</sup> Departamento de Enfermedades Infecciosas, Sanatorio Británico, Rosario, Santa Fe, Argentina.

23 <sup>10.</sup> Hospital Municipal Dr. Bernardo Houssay, Florida, Provincia de Buenos Aires, Argentina.

24 <sup>11.</sup> Fundación del Centro de Estudios Infectológicos (FUNCEI), Ciudad Autónoma de Buenos  
25 Aires, Buenos Aires, Argentina.

26

27 **\*Corresponding author** email: [waldo.belloso@hospitalitaliano.org.ar](mailto:waldo.belloso@hospitalitaliano.org.ar) (WHB). ORCID ID 0000-  
28 0002-7048-7841

29 ^Additional members of this group are listed in Supplementary Appendix.

30 ¶ These authors contributed equally to this work. Author order was determined by mutual  
31 agreement.

32

33 **Abstract**

34 Passive immunotherapy has been evaluated as a therapeutic alternative for patients with COVID-  
35 19 disease. Equine polyclonal immunotherapy for COVID-19 (EPIC) showed adequate safety and  
36 potential efficacy in a clinical trial setting and obtained emergency use authorization in Argentina.

37 We studied its utility in a real world setting with a larger population.

38 *Methods:* We conducted a retrospective cohort study at "Hospital de Campaña Escuela-Hogar" in  
39 Corrientes, Argentina, to assess safety and effectiveness of EPIC in hospitalized adults with severe  
40 COVID-19 pneumonia. Primary endpoints were 28-days all-cause mortality and safety. Mortality  
41 and improvement in modified WHO clinical scale at 14 and 21 days were secondary endpoints.  
42 Potential confounder adjustment was made by logistic regression weighted by the inverse of the  
43 probability of receiving the treatment (IPTW) and doubly robust approach.

44 *Results:* Clinical records of 395 exposed (EPIC) and 446 non-exposed (Controls) patients admitted  
45 between November 2020 and April 2021 were analyzed. Median age was 58 years and 56.8% were  
46 males. Mortality at 28 days was 15.7% (EPIC) vs. 21.5% (Control). After IPTW adjustment the  
47 OR was 0.66 (95 % CI: 0.46 - 0.96), P= 0.03. The effect was more evident in the subgroup who  
48 received two EPIC doses (complete treatment, n=379), OR: 0.58 (95% CI 0.39 to 0.85), P=0.005.  
49 Overall and serious adverse events were not significantly different between groups.

50 *Importance:* In this retrospective cohort study, EPIC showed adequate safety and effectiveness in  
51 the treatment of hospitalized patients with severe SARS-CoV-2 disease.

52

53

54

## 55 **1. Introduction**

56

57 From the beginning of the Severe Acute Respiratory Syndrome Coronavirus-2 (SARS-CoV-2)  
58 pandemic, different therapeutic approaches have been assessed in randomized controlled trials  
59 (RCT) (1). After more than 2 years of pandemic, for hospitalized patients, dexamethasone,  
60 remdesivir, tocilizumab, tofacitinib, and baricitinib have shown efficacy in adequately powered  
61 clinical trials (2-8). Passive immunotherapy has been widely studied, particularly for patients who  
62 have not yet established their specific immune response. To date, convalescent plasma (CP) has  
63 shown no effect in the treatment of patients with severe pneumonia. Among ambulatory patients  
64 with mild to moderate COVID-19 at high risk for progression to severe disease, neutralizing  
65 monoclonal antibodies such as bamlanivimab/etesevimab, casirivimab/imdevimab, and  
66 sotrovimab are also included as therapeutic options likewise the administration of  
67 nirmatrelvir/ritonavir, 3-day treatment with remdesivir, and molnupiravir (9-12). However, access  
68 to these treatments is certainly limited and the appearance and prevalence of the B.1.1.529 variant  
69 (Omicron) has threatened the efficacy of most monoclonal antibodies studied to date (13).  
70 Effective interventions for the treatment of patients with COVID-19 infection are still urgently  
71 needed.

72

73 It has been previously shown that the Receptor Binding Domain (RBD) from the viral spike  
74 glycoprotein elicits high titers of neutralizing antibodies (NAbs) against SARS-CoV-2 when used  
75 as immunogen in horses (14). Equine polyclonal antibodies (EpAbs) represent a practical and  
76 efficient source of NAbs. EpAbs are composed of F(ab')<sub>2</sub> fragments generated by pepsin digestion.  
77 We have formerly described the development of an “Equine Polyclonal Immunotherapy for

78 COVID-19” (EPIC) based on equine anti-RBD F(ab<sup>′</sup>)<sub>2</sub> fragments, known as INM005 (15). EPIC  
79 showed a very high serum neutralization titer against SARS-CoV-2 and its format, devoid of Fc  
80 domains, may prove preferable for its capacity to avoid serum sickness reactions and Fc-triggered  
81 side effects (15). The EPIC effect was evaluated in a double-blind, randomized, placebo-controlled  
82 trial among hospitalized 241 adults with moderate and severe COVID-19 pneumonia in Argentina  
83 (16). Even though the primary endpoint (improvement in at least two categories in WHO ordinal  
84 clinical scale at day 28) was not achieved (odds ratio [OR]: 1.61%, 95% confidence interval  
85 [95%CI]: 0.71 to 3.63, P=0.34), several secondary endpoints were reached: variation in ordinal  
86 clinical status during the follow-up period favored EPIC: A) improvement in at least two categories  
87 was significantly higher in the EPIC group at days 14 (OR: 0.52, 95% CI: 0.29 to 0.96, P=0.03),  
88 and 21 (OR: 0.54, 95% CI: 0.30 to 0.99, P=0.05); B) a significant difference was noted in time to  
89 improvement in at least two ordinal categories or hospital discharge: 14.2 (± 0.7) days in the EPIC  
90 group and 16.3 (± 0.7) days in the placebo group (hazard ratio: 1.31, 95% CI: 1.0 to 1.74, P=0.05).  
91 Mortality at day 28 was 6.8% in the EPIC group and 11.4% in the placebo group (OR 0.57, 95%  
92 IC: 0.24 to 1.37). Pre-specified subgroup analyses showed a more pronounced effect of the  
93 intervention among severe patients lacking antibody response at baseline.  
94 With those findings, the Argentinean National Administration of Drugs, Food, and Medical  
95 Technology (ANMAT), approved EPIC for the treatment of moderate or severe SARS-CoV-2  
96 hospitalized patients, under special conditions on December 22, 2020 (Provision 9175/20) (17).  
97 As required by this approval, the sponsor initiated a prospective nationwide registry of patients  
98 with SARS-CoV-2 infection treated with EPIC that has already included more than 10,000  
99 patients. Since data were collected on an ongoing basis, we decided to conduct a retrospective  
100 cohort analysis in a dedicated COVID-19 hospital that used the product regularly, including  
101 patients admitted to the same hospital before EPIC was available for historical comparison.

102 Therefore, the aim of this study was to evaluate the effectiveness and safety of EPIC administration  
103 in hospitalized patients with severe COVID-19 in a real-world setting.

104

## 105 **2. Objectives**

106 The objectives of the study were to compare all-cause mortality at 28 days and the proportion of  
107 serious and total adverse events during hospitalization between the exposed and unexposed groups.

108

## 109 **3. Study Design and location**

110 A retrospective cohort study was performed including adult patients hospitalized for severe  
111 pneumonia with confirmed diagnosis of SARS-CoV-2. The date of hospital admission was  
112 considered as the date of admission into the cohort for both groups. All patients were evaluated in  
113 a structured manner at days 14, 21 and 28 from inclusion.

114 All cohort participants were enrolled at the “Hospital de Campaña Escuela-Hogar” (HCEH), a  
115 single monovalent site established as a reference center for the diagnosis and treatment of patients  
116 with COVID-19 for the whole province in Corrientes city, located in the northeastern region of  
117 Argentina. HCEH is a paper-free facility with 723 beds, 300 of which are equipped for critical  
118 care.

119

120 The study cohort subjects were divided in two groups: those “exposed to EPIC or EPIC group”  
121 that received treatment with purified equine anti-RBD F(ab')<sub>2</sub> fragments (EPIC, CoviFab®) and  
122 those “Non-exposed or Control group” that never received that intervention.

123 Following ANMAT's approval, issued on January 27th, 2021, EPIC was adopted as standard of  
124 care for patients with COVID-19 within the HCEH. Therefore, we selected that date to divide the  
125 cohort groups in exposed cases onward from that date to April 17th, 2021, and non-exposed cohort  
126 group backward from January 21st, 2021 to November 25th, 2020 in order to increase  
127 comparability, and also to avoid the possibility of a learning curve period for the treatment of  
128 patients with COVID-19 close to the beginning of operations at HCEH.

129 The study protocol was approved by the Institutional Review Boards from both the HCEH and the  
130 "Hospital Italiano" of Buenos Aires city, Argentina. The protocol was registered in  
131 ClinicalTrials.gov with the number NCT04954235. All data extracted from the electronic clinical  
132 records was anonymized at completion of the structured study forms and remained in that way for  
133 the whole analysis process.

134

#### 135 **4. Methods**

##### 136 **Population**

137 Adult patients with confirmed diagnosis of SARS-CoV-2 severe pneumonia hospitalized at HCEH  
138 between November 25th, 2020 until April 17th, 2021, meeting the study selection criteria.

139

##### 140 **Exposure**

141 Patients were labeled as exposed (EPIC) if they received at least one of 2 doses of 4 mg/Kg of  
142 EPIC in intravenous infusion of 100 ml of saline over a period of fifty minutes (with an interval of  
143 48 hours between doses). The control group was recruited among hospitalized patients that did not  
144 receive that intervention because they were hospitalized before EPIC was available.

145

#### 146 **Selection criteria**

147 Patients were included in the study if had between 18 and 79 years old, COVID-19 diagnosis  
148 confirmed by SARS-CoV-2 antigen test or reverse-transcriptase-polymerase-chain reaction (qRT-  
149 PCR -GeneDX Co, Ltd or similar) or positive anti SARS-CoV-2 IgM antibodies, had severe  
150 disease defined as: respiratory rate of more than 30/min, or oxygen saturation <94% on room air  
151 at sea level, or a ratio of arterial partial pressure of oxygen to fraction of inspired oxygen  
152 (PaO<sub>2</sub>/FiO<sub>2</sub>) <300 mm Hg, or lung compromise of more than 50%.

153 Exclusion criteria were: SARS-CoV-2 disease other than severe (asymptomatic, mild, moderate or  
154 critical), pregnant women or during lactation period, patients already admitted to intensive care  
155 unit (ICU), confirmation of microbiological cause of pneumonia other than SARS-CoV-2, patients  
156 with therapeutic limitation or patients with history of anaphylaxis or severe allergic reaction to  
157 equine sera or to contact or exposure to horse proteins. A detailed description of the disease severity  
158 categories is provided in the Supplementary Appendix.

159

#### 160 **Data collection**

161 Data capture was performed through ACTide-eCRF, an electronic case report form based on a  
162 multi-platform interface that was previously reviewed by ANMAT and used for the registry of all  
163 patients receiving EPIC in accordance with Provision 4622/12 regarding “Authorization under  
164 Special Conditions”. This platform was in full agreement with current regulations regarding  
165 validation, compliance and certification of computing systems (e.g., CFR 21 Part 11, EU GMP



166 Annex 11, GAMP5, GDPR and HIPAA). A specific allowance system was implemented for the  
167 study based upon personnel roles.

168 Patients from the exposed group provided written informed consent for the administration of EPIC.

169 A team of physicians trained on data collection retrieved the required information for each selected  
170 patient at baseline, and at days 14, 21, and 28 using specifically designed structured forms.

171 Patients from the non-exposed group were identified through a systematic review of the electronic  
172 clinical records from HCEH, and their data was retrieved by the same data collection team using  
173 the same structured forms.

#### 174 **Variables**

175 Structured forms used for both cohort groups included demographic variables (age in years, gender  
176 at birth and body mass index-BMI), comorbidities (hypertension, diabetes, obesity, cancer, chronic  
177 obstructive pulmonary disease, chronic hepatic insufficiency, chronic renal insufficiency and  
178 cardiovascular disease), use of convalescent plasma since 30 days prior to hospital admission,  
179 Charlson Score as a measure of comorbidity prognosis, clinical variables at baseline (diagnostic  
180 method, time from symptoms onset, respiratory rate, oxygen saturation, PaO<sub>2</sub>/FiO<sub>2</sub>, requirement  
181 of supplementary oxygen and National Early Warning Score-NEWS), and variables related to  
182 clinical outcomes including WHO-modified 6-points ordinal clinical scale (18-20). Further details  
183 of variable operationalization are provided in the Supplementary Appendix.

184

#### 185 **Outcomes**

186 Primary outcome was all-cause mortality between cohort groups at day 28 since cohort admission.

187 Secondary outcomes included mortality between groups at day 14 and 21 since cohort admission,

188 WHO-modified 6-points ordinal clinical scale (1 non-hospitalized with full restitution of physical

189 functions, 2 non hospitalized without complete restitution of physical functions, 3 hospitalized  
190 without oxygen requirement, 4 hospitalized requiring supplemental oxygen, 5 invasive ventilatory  
191 support and 6 death) measured at days 14, 21 and 28, the proportion of patients discharged from  
192 hospital at same intervals, time (in days) between cohort admission and hospital discharge,  
193 proportion of patients transferred to ICU, time (in days) since cohort admission to discharge from  
194 ICU, proportion of patients requiring mechanical ventilation, and time (in days) since cohort  
195 admission to start of mechanical ventilation (21).

196 Safety outcomes included the percentage of patients suffering from any type and/or serious adverse  
197 events. For all adverse events the following data was captured: start and end date, severity,  
198 causality assessment, and treatment. The Adverse Event table was organized according to the  
199 MedDRA SOC (System Organ Class).

200

## 201 **Sample size**

202 Based upon a prior experience with the use of EPIC in the context of a clinical trial, an estimated  
203 mortality of 24% for the “non-exposed” patients was assumed. As such, a reduction in mortality  
204 of at least 8% (e.g., 16% for exposed and 24% for non-exposed patients) was considered clinically  
205 meaningful. With these assumptions, a minimal inclusion of 392 exposed and 392 non-exposed  
206 patients (784 patients in total) was required for a two-tailed test with an  $\alpha$  error of 5% and 80% of  
207 statistical power. We aimed to include a sample size of 800 patients (1:1 ratio with 400 in each  
208 cohort group).

209

## 210 **Statistical methods and bias management**

211 We used absolute and relative frequencies (percentages) to describe categorical variables, mean  
212 and standard deviation (SD), or median and interquartile range (IQR: 25th centile and 75th centile)  
213 to describe quantitative variables. We used Chi-square test or Fisher's exact test for categorical  
214 variables and T test or Wilcoxon rank sum test to compare the exposed and non-exposed  
215 characteristics.

216 Effectiveness estimates for treatment might be confounded by indication as a result of treatment  
217 decisions based on observed characteristics. Given the observational nature of the study, we use  
218 an inverse probability of treatment weighting (IPTW) approach to estimate the causal association  
219 -also referred as average treatment effect- of EPIC considering potential confounders (22). This  
220 method, which is an extension of the propensity score, is particularly helpful in the estimation of  
221 causal associations when a randomized clinical trial is unfeasible. The IPTW approach generates  
222 weighted cohorts removing the differences in relevant observed confounders (23).

223 We estimated the propensity score (PS) of EPIC exposure using a logistic regression model with  
224 EPIC exposure as dependent variable and the following potential predictors of treatment: gender  
225 at birth, age, clinical parameters at cohort admission (respiratory rate, heart rate, body temperature,  
226 oxygen saturation), requirement of supplementary oxygen or non-invasive ventilation, Charlson's  
227 Score, National Early Warning Score (NEWS), time from symptoms onset, prior use of angiotensin  
228 converting enzyme inhibitors, non-steroidal antiinflammatory agents, corticosteroids, heparin,  
229 immunosuppressants, ivermectin or statins; presence and number of comorbidities: obesity,  
230 cardiovascular disease, stroke, hemiplegia, hypertension, chronic lung disease, chronic renal

231 disease, dementia, peptic ulcer, diabetes with or without target organ damage, solid organ tumor  
232 or leukemia. With this propensity score we calculated the stabilized IPTW. The weights were  
233 truncated at percentile 1% and 99% to avoid extreme figures.

234 We used Cox's proportional hazards regression model to estimate the hazard ratio (HR) for  
235 calculation of the primary endpoint. We also informed the OR between cohort groups calculated  
236 with a logistic regression model. The effect of EPIC on the distribution of the modified WHO-  
237 clinical ordinal scale at 14, 21 and 28 days was accessed with an ordinal logistic regression model  
238 and presented as proportional Odds Ratio using Brant test (parallel regression assumption test)  
239 (pOR) (24-28). We used conventional logistic regression models to estimate the Odds Ratio (OR)  
240 of the exposure to EPIC on the comparison of the proportion of hospital discharge at 14, 21 and  
241 28 days, and the proportion of adverse effects. We use Fine and Gray's regression model to  
242 estimate the subhazard ratio (sHR) for the association between EPIC and the requirement of  
243 mechanical ventilation using death as a competing event (29).

244 For the primary analysis we estimated the causal association between EPIC exposure and primary  
245 or secondary outcomes using regression models weighted by the inverse of the probability of  
246 receiving treatment, considering EPIC exposure as the independent variable (IPTW). In addition,  
247 we presented the data with a conventional adjustment for potential confounders either with the raw  
248 data and with the IPTW-treated data, in a doubly robust approach. Variables included in this  
249 adjustment included: gender at birth, age, respiratory rate at cohort entry, oxygen saturation,  
250 requirement of supplementary oxygen or non-invasive ventilation, Charlson's Score, NEWS, time  
251 from symptoms onset, obesity, cancer and chronic lung disease. We presented all data with 95%  
252 confidence interval (95% CI). To assess the balance in potential confounders between exposure  
253 groups, we used standardized differences before and after IPTW adjusting. We considered

254 balanced covariates all those who had standardized differences lower than 10% after IPTW  
255 adjusting (30). We presented the balance diagnosis of IPTW in a Love plot according to Austin  
256 and Stuart (31).

257 We performed predefined subgroup analysis of primary outcomes considering gender at birth, age  
258 category groups (less than 65, or between 65 and 79 years old), time from symptoms initiation  
259 (less than 3 days, between 3 and 5, between 5 and 10 or more than 10), obesity, presence and  
260 number of main comorbidities (immunosuppression, diabetes, hypertension, cardiovascular  
261 disease) and number of doses of EPIC (one versus two). We also performed a sensitivity analysis  
262 considering the patients from the “Control” group that did or did not receive convalescent plasma.

263 The detailed statistical analysis plan is provided in the Supplementary Appendix. All tests were  
264 two-sided, and a P value <0.05 was considered statistically significant. All statistical analysis was  
265 performed using STATA statistical software version 15.1 MP - Parallel Edition (Copyright 1985-  
266 2017 StataCorp LLC - StataCorp. 4905 Lakeway Drive, College Station, Texas 77845 USA).

267

## 268 **5. Results**

### 269 **Patients**

270 Following protocol’s approval, data collection from both cohort groups started on May 27th, 2021.  
271 During the pre-specified -backward and onward- collection times, from 1352 clinical records  
272 reviewed, 395 patients met the inclusion criteria for the EPIC group and 446 patients were included  
273 in the Control group, for a total cohort of 841 patients. Fig. 1 depicts the complete patient  
274 disposition.

275 Median age was 58 years old (interquartile range 48 to 69), and 57.9% were male. Body mass

276 index was 31.1 (interquartile range 28.1 to 36) in the EPIC group and 28.6 (interquartile range 26  
277 to 33.2) in the Control group, with 117 and 235 patients in the EPIC group, and 194 and 176  
278 patients in the Control group reaching the standard definition for overweight and obesity,  
279 respectively. Standard and modified Charlson's scores at cohort entry were similar between  
280 groups.

281 At cohort admission the median time from symptoms initiation was 7 days (interquartile range 5  
282 to 8) for the EPIC group and 6 days (interquartile range 3 to 9) for the Control group.

283 While most patients had at least one identified comorbidity, significantly more patients had no  
284 comorbidities in the Control group than in the EPIC Group: 67 (15%) vs. 36 (9.1%), respectively,  
285  $p=0.009$ . Obesity -235 patients (59.5%) and 176 (39.5%),  $P=<0.001$ - along with hypertension -  
286 228 (57.7%) and 242 (54.3%)-, and diabetes -111 (28.1%) and 110 (24.7%) in EPIC and Control  
287 groups, respectively, were the most prevalent coexisting conditions.

288 No statistically significant differences were found in body temperature, and heart and respiratory  
289 rates between cohort groups, whereas oxygen saturation at cohort entry was 92% (interquartile  
290 range 89 to 93%) for EPIC group and 90.5% (interquartile range 88 to 93) for the Control group,  
291 ( $P<0.0001$ ). Accordingly, the modified NEWS score at cohort admission was significantly  
292 different between groups ( $P=0.006$ ).

293 A total of 46.3% of the cohort patients (179 in EPIC group and 211 in the Control group) were  
294 receiving antihypertensive drug treatment (angiotensin converting enzyme inhibitors and  
295 angiotensin receptor blockers) at admission, while a minority of patients received other drugs as  
296 immunosuppressants, statins, anticoagulants, ivermectin, and corticosteroids, none of them being  
297 statistically different between groups. A more detailed description of the baseline patient  
298 conditions and comparison between cohort groups is shown in Table 1.

299 During the cohort follow up time 395 patients (100%) in the EPIC group and 406 patients (91%)  
300 in the Control group received corticosteroids, 392 (99%) and 410 (91.9%) received heparin, 274  
301 (69.4%) and 321 (72%) received antibiotics, respectively, while 317 (71.19%) in the Control group  
302 received convalescent plasma (exclusion criterion for EPIC group). A complete description of  
303 concomitant treatment interventions during cohort follow up is shown in Table 2.

304

#### 305 Intervention

306 No patients in the Control group received polyclonal specific hyperimmune serum against SARS-  
307 CoV-2. All three hundred and ninety-five patients in the EPIC group received one dose of  
308 hyperimmune serum and 379 patients (96%) completed the two-dose pre-specified treatment.  
309 Reasons for failure in completing the intervention included admission to UCI and staff refusal to  
310 continue treatment (10 cases), adverse events (2 cases), patient voluntary discharge from Hospital  
311 (1 case), patient refusal (1 case) and other reasons (2 cases).

312

#### 313 Primary outcome

314 Overall mortality at 28 days was significantly lower for patients in the EPIC group than for patients  
315 in the Control group. The OR was 0.66 (95% CI 0.46 to 0.96  $p=0.03$ ) and the HR for the IPTW-  
316 adjusted data was 0.70 (95% CI 0.50-0.98  $p=0.037$ ). The doubly robust approaches provided  
317 similar results (Table 3, Fig. 2).

318

#### 319 Secondary outcomes

320 Overall mortality at 21 and 14 days were not statistically different between cohort groups (OR for

321 the IPTW-adjusted data and for the doubly robust approach were 0.72 [95% CI 0.49 to 1.06] and  
322 0.73 [95% CI 0.48 to 1.10], and 0.81 [95% CI 0.52 to 1.26] and 0.86 [95% CI 0.53 to 1.39],  
323 respectively.

324 WHO-modified 6 points ordinal clinical scale results were significantly better for the EPIC group  
325 than for the Control group at 14 days (proportional OR 0.71 [95% CI 0.53 to 0.95] for IPTW-  
326 adjusted and proportional OR 0.68 [95% CI 0.50 to 0.94] for the doubly robust approach), while  
327 no significant differences were noted at days 21 and 28 between groups (Table 3, Fig. S2).

328 Hospital discharge rate was also significantly higher for the EPIC group than for the Control group  
329 at 14 days (OR 1.46 [95% CI 1.07 to 1.98] for IPTW-adjusted and OR 1.49 [95% CI 1.07 to 2.09]  
330 for the doubly robust approach), while no differences were found between cohort groups at days  
331 21 and 28.

332 No significant differences were found between groups in median time to hospital discharge,  
333 proportion of patients requiring admission to ICU, median time until discharge from ICU,  
334 proportion of patients requiring mechanical ventilation or median time until initiation of  
335 mechanical ventilation. Complete results for secondary outcomes are shown in Table S2 and Fig.  
336 S3, S4 and S5.

337

338 Safety outcomes

339 Safety outcomes included the percentage of patients with any type and/or serious adverse events,  
340 and the comparison of total and serious adverse events (AE) during hospital admission between  
341 EPIC and Control groups.

342 EPIC was overall well tolerated, 98 patients (24.8%) in the EPIC group and 121 (27.1%) in the



343 Control group had at least one adverse event, being respiratory, thoracic and mediastinal disorders  
344 (20.3% in EPIC group and 26% in Control group), and administration site complications (11.6%  
345 in EPIC and 9.6% in Control group) the most frequently observed, with no statistical difference  
346 between cohort groups. Two patients out of 395 in the EPIC group did not receive the second dose  
347 of the study product due to adverse events, i.e., a cutaneous rash and a hypotension event, both of  
348 which resolved satisfactorily.

349  
350 Serious adverse events (SAE) were frequently observed among cohort patients, probably due to  
351 the population characteristics, although no significant difference between groups was observed.  
352 SAE occurred in 78 patients (19.7%) in the EPIC group and in 106 (23.8%) in the Control group.  
353 Six AEs were considered probable or possibly related to EPIC.

354 No anaphylaxis event was reported, and no death episodes were considered by the investigators to  
355 be related to the investigational product. Table 4 and Table S4 show a more detailed description  
356 of the AE between cohort groups.

357  
358 **6. Discussion**

359  
360 In this retrospective study, the administration of at least one infusion of EPIC for hospitalized  
361 patients with severe COVID-19 significantly reduced the 28-day mortality by 34% (15.7% vs  
362 21.5%) compared with a group of patients treated at the same hospital before EPIC was available.  
363 This effect was more evident in patients receiving the two infusions of the investigational product  
364 (28-day mortality of 14% vs 21.5%), resulting in 13 patients needed to treat in order to prevent  
365 one additional death. During the trial, EPIC-related adverse events were minimal and non-serious.

366 Currently, no virus directed therapy has shown to reduce mortality among hospitalized patients  
367 with severe SARS-CoV-2 infection; only agents decreasing the inflammatory response such as  
368 dexamethasone, baricitinib (or tofacitinib), and tocilizumab (or sarilumab) were able to reduce the  
369 mortality rate in this setting (3, 7, 32, 33).

370 Administration of different types of immunotherapy has been explored as a therapeutic approach  
371 for patients with severe COVID-19 disease with variable results. Recent data from three  
372 randomized clinical trials studies comparing anti-spike mAbs (bamlanivimab, VIR-7831, and the  
373 combination BRII-196/198) with placebo were terminated due futility after randomization of 314,  
374 344 and 343 patients, respectively (34, 35).

375 However and as expected, most of the clinical benefits obtained from passive immunotherapies  
376 might be observed in patients lacking specific anti-SAR-CoV-2 antibodies due to a delayed  
377 response or to immunocompromise. In this regard, among patients randomized to placebo in the  
378 Recovery trial, the 28-day mortality was significantly higher in the baseline seronegative group  
379 (30%) than in the seropositive one (15%). Even more, in those lacking specific antibodies at  
380 baseline, the mortality was 24% and 30% in the mAbs combination and placebo arm, respectively  
381 (rate ratio 0.80) (36).

382 The positive impact of polyclonal equine anti-RBD F(ab')<sub>2</sub> fragments described here might follow  
383 the findings reported in the Recovery clinical trial. Given the observational nature of this study,  
384 baseline anti-SARS-CoV-2 immune status could not be determined. Lacking this information  
385 forbidden us to identify a subgroup of seronegative patients who might have benefited the most  
386 from this type of therapy. Remarkably, a significant effect on the primary outcome was observed  
387 for the entire population while in the Recovery trial that enrolled 9785 patients, a decrease in the  
388 28-day mortality was seen only in those with no baseline antibodies (36).

389 It should be noted that, in a double-blind randomized clinical trial, the treatment of EPIC was  
390 associated with a 45% non-statistically significant decrease in mortality among the subgroup of  
391 severe patients hospitalized with COVID-19 disease (16) (13.6% in the EPIC group vs 24.5% in  
392 the placebo group, OR: 0.52). It is likely that this outcome did not reach statically significance  
393 because of the low number of severe patients enrolled. Moreover, EPIC showed a statistically  
394 significant difference in the WHO-modified 6 points ordinal clinical scale at 14 days. This was  
395 correlated with also a statistically significant difference at hospital discharge rate at 14 days. These  
396 effects were not observed neither at day 21 nor at day 28 (16).

397 In regard to safety results, these findings were as expected in patients with COVID-19 severe  
398 disease as adverse events observed were mainly related to disease progression and complications  
399 such as multiorgan failure and in similar proportions in both groups. EPIC showed a good safety  
400 profile similar to the one observed in the RCT. All related events were treated and resolved  
401 satisfactorily within the same date. In this real-world experience only in 2 of the 395 patients  
402 treated with EPIC the second dose was not infused due to adverse events during the first dose.  
403 These findings are aligned with the adverse event reporting rate observed through the Argentinean  
404 EPIC registry of 10.728 patients where hypersensitivity events were reported in a frequency of 1-  
405 2% through the period December 2020 and August 2021 (37).

406 The main limitation of the study is the non-randomized design; however, data collection included  
407 structured forms applied for subjects enrolled in both cohort groups and at the same Hospital. Even  
408 more, all hospitalized subjects with COVID-19 were evaluated and enrolled in the study in a  
409 consecutive manner. Another existing limitation is that patients were included in one clinical site,  
410 missing the generalizability observed in multicenter trials. Of note, the results shown here should  
411 not be extrapolated to the vaccinated population nor to those with prior COVID-19 disease since

412 only one participant had received a COVID-19 vaccine and a history of SARS-CoV-2 infection  
413 was an exclusion criterion.

414 Although this was not fully studied, it can be speculated that most of the patients enrolled in this  
415 study were probably infected with the Gamma or P.1 variant due to the epidemiological situation  
416 of Argentina at the time of study. Nevertheless, being of polyclonal nature, EPIC has a broader  
417 recognition of epitopes on RBD Spike protein than mAbs, making this immunotherapy more robust  
418 against viral scape mutations. Interestingly, EPIC showed high neutralizing activity against  
419 Gamma and Delta variants of concern and was also capable of neutralizing Omicron, although  
420 with less efficiency (Gallego S. et al., unpublished data). Therefore, the clinical benefit observed  
421 in this study could be extrapolated to patients infected with any of the above-mentioned variants  
422 of concern.

423

## 424 **7. Conclusion**

425 After proper adjustment by confounders, this retrospective study in a real-world setting suggests a  
426 favorable effect of EPIC on the 28-day mortality rate in patients with severe SARS-CoV-2  
427 infection admitted to a monovalent hospital site in Argentina, with an adequate safety profile.

428

## 429 **Funding**

430 Funded by Inmunova SA. and Laboratorio Elea Phoenix S.A.

431

## 432 **7. References**

433 1. Thoguluva Chandrasekar V, Venkatesalu B, Patel HK, Spadaccini M, Manteuffel J, Ramesh

- 434 M. 2021. Systematic review and meta-analysis of effectiveness of treatment options against  
435 SARS-CoV-2 infection. *J Med Virol* 93:775–785.
- 436 2. Sterne JAC, Murthy S, Diaz J V., Slutsky AS, Villar J, Angus DC, Annane D, Azevedo  
437 LCP, Berwanger O, Cavalcanti AB, Dequin P-F, Du B, Emberson J, Fisher D, Giraudeau  
438 B, Gordon AC, Granholm A, Green C, Haynes R, Heming N, Higgins JPT, Horby P, Jüni  
439 P, Landray MJ, Le Gouge A, Leclerc M, Lim WS, Machado FR, McArthur C, Meziani F,  
440 Møller MH, Perner A, Petersen MW, Savovic J, Tomazini B, Veiga VC, Webb S, Marshall  
441 JC. 2020. Association Between Administration of Systemic Corticosteroids and Mortality  
442 Among Critically Ill Patients With COVID-19. *JAMA* 324:1330.
- 443 3. RECOVERY Collaborative Group. 2021. Dexamethasone in Hospitalized Patients with  
444 Covid-19. *N Engl J Med* 384:693–704.
- 445 4. Beigel JH, Tomashek KM, Dodd LE, Mehta AK, Zingman BS, Kalil AC, Hohmann E, Chu  
446 HY, Luetkemeyer A, Kline S, Lopez de Castilla D, Finberg RW, Dierberg K, Tapson V,  
447 Hsieh L, Patterson TF, Paredes R, Sweeney DA, Short WR, Touloumi G, Lye DC,  
448 Ohmagari N, Oh M, Ruiz-Palacios GM, Benfield T, Fätkenheuer G, Kortepeter MG, Atmar  
449 RL, Creech CB, Lundgren J, Babiker AG, Pett S, Neaton JD, Burgess TH, Bonnett T, Green  
450 M, Makowski M, Osinusi A, Nayak S, Lane HC. 2020. Remdesivir for the Treatment of  
451 Covid-19 — Final Report. *N Engl J Med* 383:1813–1826.
- 452 5. Goldman JD, Lye DCB, Hui DS, Marks KM, Bruno R, Montejano R, Spinner CD, Galli M,  
453 Ahn M-Y, Nahass RG, Chen Y-S, SenGupta D, Hyland RH, Osinusi AO, Cao H, Blair C,  
454 Wei X, Gaggar A, Brainard DM, Towner WJ, Muñoz J, Mullane KM, Marty FM, Tashima  
455 KT, Diaz G, Subramanian A. 2020. Remdesivir for 5 or 10 Days in Patients with Severe  
456 Covid-19. *N Engl J Med* 383:1827–1837.
- 457 6. Spinner CD, Gottlieb RL, Criner GJ, Arribas López JR, Cattelan AM, Soriano Viladomiu

- 458 A, Ogbuagu O, Malhotra P, Mullane KM, Castagna A, Chai LYA, Roestenberg M, Tsang  
459 OTY, Bernasconi E, Le Turnier P, Chang S-C, SenGupta D, Hyland RH, Osinusi AO, Cao  
460 H, Blair C, Wang H, Gaggar A, Brainard DM, McPhail MJ, Bhagani S, Ahn MY, Sanyal  
461 AJ, Huhn G, Marty FM. 2020. Effect of Remdesivir vs Standard Care on Clinical Status at  
462 11 Days in Patients With Moderate COVID-19. *JAMA* 324:1048.
- 463 7. RECOVERY Collaborative Group. 2021. Tocilizumab in patients admitted to hospital with  
464 COVID-19 (RECOVERY): a randomised, controlled, open-label, platform trial. *Lancet*  
465 (London, England) 397:1637–1645.
- 466 8. Kalil AC, Patterson TF, Mehta AK, Tomashek KM, Wolfe CR, Ghazaryan V, Marconi VC,  
467 Ruiz-Palacios GM, Hsieh L, Kline S, Tapson V, Iovine NM, Jain MK, Sweeney DA, El  
468 Sahly HM, Branche AR, Regalado Pineda J, Lye DC, Sandkovsky U, Luetkemeyer AF,  
469 Cohen SH, Finberg RW, Jackson PEH, Taiwo B, Paules CI, Arguinchona H, Erdmann N,  
470 Ahuja N, Frank M, Oh M-D, Kim E-S, Tan SY, Mularski RA, Nielsen H, Ponce PO, Taylor  
471 BS, Larson L, Roupheal NG, Saklawi Y, Cantos VD, Ko ER, Engemann JJ, Amin AN,  
472 Watanabe M, Billings J, Elie M-C, Davey RT, Burgess TH, Ferreira J, Green M, Makowski  
473 M, Cardoso A, de Bono S, Bonnett T, Proschan M, Deye GA, Dempsey W, Nayak SU,  
474 Dodd LE, Beigel JH, ACTT-2 Study Group Members. 2021. Baricitinib plus Remdesivir  
475 for Hospitalized Adults with Covid-19. *N Engl J Med* 384:795–807.
- 476 9. ACTIV-3/TICO LY-CoV555 Study Group, Lundgren JD, Grund B, Barkauskas CE,  
477 Holland TL, Gottlieb RL, Sandkovsky U, Brown SM, Knowlton KU, Self WH, Files DC,  
478 Jain MK, Benfield T, Bowdish ME, Leshnowar BG, Baker J V, Jensen J-U, Gardner EM,  
479 Ginde AA, Harris ES, Johansen IS, Markowitz N, Matthay MA, Østergaard L, Chang CC,  
480 Davey VJ, Goodman A, Higgs ES, Murray DD, Murray TA, Paredes R, Parmar MKB,  
481 Phillips AN, Reilly C, Sharma S, Dewar RL, Teitelbaum M, Wentworth D, Cao H, Klekotka

- 482 P, Babiker AG, Gelijns AC, Kan VL, Polizzotto MN, Thompson BT, Lane HC, Neaton JD.  
483 2021. A Neutralizing Monoclonal Antibody for Hospitalized Patients with Covid-19. *N*  
484 *Engl J Med* 384:905–914.
- 485 10. Chen P, Nirula A, Heller B, Gottlieb RL, Boscia J, Morris J, Huhn G, Cardona J, Mocherla  
486 B, Stosor V, Shawa I, Adams AC, Van Naarden J, Custer KL, Shen L, Durante M, Oakley  
487 G, Schade AE, Sabo J, Patel DR, Klekotka P, Skovronsky DM. 2021. SARS-CoV-2  
488 Neutralizing Antibody LY-CoV555 in Outpatients with Covid-19. *N Engl J Med* 384:229-  
489 237.
- 490 11. Weinreich DM, Sivapalasingam S, Norton T, Ali S, Gao H, Bhore R, Musser BJ, Soo Y,  
491 Rofail D, Im J, Perry C, Pan C, Hosain R, Mahmood A, Davis JD, Turner KC, Hooper AT,  
492 Hamilton JD, Baum A, Kyratsous CA, Kim Y, Cook A, Kampman W, Kohli A, Sachdeva  
493 Y, Graber X, Kowal B, DiCioccio T, Stahl N, Lipsich L, Braunstein N, Herman G,  
494 Yancopoulos GD, Trial Investigators. 2021. REGN-COV2, a Neutralizing Antibody  
495 Cocktail, in Outpatients with Covid-19. *N Engl J Med* 384:238–251.
- 496 12. Gupta A, Gonzalez-Rojas Y, Juarez E, Crespo Casal M, Moya J, Falci DR, Sarkis E, Solis  
497 J, Zheng H, Scott N, Cathcart AL, Hebner CM, Sager J, Mogalian E, Tipple C, Peppercorn  
498 A, Alexander E, Pang PS, Free A, Brinson C, Aldinger M, Shapiro AE. 2021. Early  
499 Treatment for Covid-19 with SARS-CoV-2 Neutralizing Antibody Sotrovimab. *N Engl J*  
500 *Med* 385:1941–1950.
- 501 13. VanBlargan LA, Errico JM, Halfmann PJ, Zost SJ, Crowe JE, Purcell LA, Kawaoka Y,  
502 Corti D, Fremont DH, Diamond MS. 2022. An infectious SARS-CoV-2 B.1.1.529 Omicron  
503 virus escapes neutralization by therapeutic monoclonal antibodies. *Nat Med*  
504 <https://doi.org/10.1038/s41591-021-01678-y>.
- 505 14. Boyer L, Degan J, Ruha A-M, Mallie J, Mangin E, Alagón A. 2013. Safety of intravenous

- 506 equine F(ab')<sub>2</sub>: Insights following clinical trials involving 1534 recipients of scorpion  
507 antivenom. *Toxicon* 76:386–393.
- 508 15. Zylberman V, Sanguineti S, Pontoriero A V, Higa S V, Cerutti ML, Morrone Seijo SM,  
509 Pardo R, Muñoz L, Acuña Intriери ME, Alzogaray VA, Avaro MM, Benedetti E, Berguer  
510 PM, Bocanera L, Bukata L, Bustelo MS, Campos AM, Colonna M, Correa E, Cragnaz L,  
511 Dattero ME, Dellafiore M, Foscaldi S, González J V, Guerra LL, Klinke S, Labanda MS,  
512 Lauché C, López JC, Martínez AM, Otero LH, Peyric EH, Ponziani PF, Ramondino R,  
513 Rinaldi J, Rodríguez S, Russo JE, Russo ML, Saavedra SL, Seigelchifer M, Sosa S, Vilariño  
514 C, López Biscayart P, Corley E, Spatz L, Baumeister EG, Goldbaum FA. 2020.  
515 Development of a hyperimmune equine serum therapy for COVID-19 in Argentina.  
516 *Medicina (B Aires)* 80 Suppl 3:1–6.
- 517 16. Lopardo G, Belloso WH, Nannini E, Colonna M, Sanguineti S, Zylberman V, Muñoz L,  
518 Dobarro M, Lebersztein G, Farina J, Vidiella G, Bertetti A, Crudo F, Alzogaray MF,  
519 Barcelona L, Teijeiro R, Lambert S, Scublinsky D, Iacono M, Stanek V, Solari R, Cruz P,  
520 Casas MM, Abusamra L, Luciardi HL, Cremona A, Caruso D, de Miguel B, Lloret SP,  
521 Millán S, Kilstein Y, Pereiro A, Sued O, Cahn P, Spatz L, Goldbaum F. 2021. RBD-specific  
522 polyclonal F(ab')<sub>2</sub> fragments of equine antibodies in patients with moderate to severe  
523 COVID-19 disease: A randomized, multicenter, double-blind, placebo-controlled, adaptive  
524 phase 2/3 clinical trial. *EClinicalMedicine* 34:100843.
- 525 17. Argentinean National Administration of Drugs, Food, and Medical Technology  
526 (ANMAT). 2012. Disposition 4622.  
527 [http://www.anmat.gov.ar/boletin\\_anmat/agosto\\_2012/Dispo\\_4622-12.pdf](http://www.anmat.gov.ar/boletin_anmat/agosto_2012/Dispo_4622-12.pdf).
- 528 18. Charlson ME, Pompei P, Ales KL, MacKenzie CR. 1987. A new method of classifying  
529 prognostic comorbidity in longitudinal studies: development and validation. *J Chronic Dis*



- 530 40:373–83.
- 531 19. Salvi F, Miller MD, Grilli A, Giorgi R, Towers AL, Morichi V, Spazzafumo L, Mancinelli  
532 L, Espinosa E, Rappelli A, DessÃ–Fulgheri P. 2008. A Manual of Guidelines to Score the  
533 Modified Cumulative Illness Rating Scale and Its Validation in Acute Hospitalized Elderly  
534 Patients. *J Am Geriatr Soc* 56:1926–1931.
- 535 20. Royal College of Physicians. 2017. [https://www.rcplondon.ac.uk/projects/outputs/national-](https://www.rcplondon.ac.uk/projects/outputs/national-early-warning-score-news-2)  
536 [early-warning-score-news-2](https://www.rcplondon.ac.uk/projects/outputs/national-early-warning-score-news-2).
- 537 21. Marshall JC, Murthy S, Diaz J, Adhikari NK, Angus DC, Arabi YM, Baillie K, Bauer M,  
538 Berry S, Blackwood B, Bonten M, Bozza F, Brunkhorst F, Cheng A, Clarke M, Dat VQ, de  
539 Jong M, Denholm J, Derde L, Dunning J, Feng X, Fletcher T, Foster N, Fowler R, Gobat  
540 N, Gomersall C, Gordon A, Glueck T, Harhay M, Hodgson C, Horby P, Kim Y, Kojan R,  
541 Kumar B, Laffey J, Malvey D, Martin-Loeches I, McArthur C, McAuley D, McBride S,  
542 McGuinness S, Merson L, Morpeth S, Needham D, Netea M, Oh M-D, Phyu S, Piva S, Qiu  
543 R, Salisu-Kabara H, Shi L, Shimizu N, Sinclair J, Tong S, Turgeon A, Uyeki T, van de  
544 Veerdonk F, Webb S, Williamson P, Wolf T, Zhang J. 2020. A minimal common outcome  
545 measure set for COVID-19 clinical research. *Lancet Infect Dis* 20:e192–e197.
- 546 22. Katz MH. 2011. *Multivariate analysis: A Practical Guide for Clinicians and Public Health*  
547 *Researchers*. Cambridge University Press.
- 548 23. Matschinger H, Heider D, König H-H. 2020. A Comparison of Matching and Weighting  
549 Methods for Causal Inference Based on Routine Health Insurance Data, or: What to do If  
550 an RCT is Impossible. *Das Gesundheitswes* 82:S139–S150.
- 551 24. Peduzzi P, Concato J, Kemper E, Holford TR, Feinstein AR. 1996. A simulation study of  
552 the number of events per variable in logistic regression analysis. *J Clin Epidemiol* 49:1373–  
553 1379.

- 554 25. McCullagh P. 1980. Regression Models for Ordinal Data. *J R Stat Soc Ser B* 42:109–127.
- 555 26. Williams R. 2016. Understanding and interpreting generalized ordered logit models. *J Math*  
556 *Sociol* 40:7–20.
- 557 27. University of California Los Angeles. Ordered logistic regression | Stata annotated output.  
558 <https://stats.idre.ucla.edu/stata/output/ordered-logistic-regression/>. Retrieved 17 July 2021.
- 559 28. Brant R. 1990. Assessing Proportionality in the Proportional Odds Model for Ordinal  
560 Logistic Regression. *Biometrics* 46:1171.
- 561 29. Fine JP, Gray RJ. 1999. A Proportional Hazards Model for the Subdistribution of a  
562 Competing Risk. *J Am Stat Assoc* 94:496–509.
- 563 30. Ho DE, Imai K, King G, Stuart EA. 2007. Matching as Nonparametric Preprocessing for  
564 Reducing Model Dependence in Parametric Causal Inference. *Polit Anal* 15:199–236.
- 565 31. Austin PC, Stuart EA. 2015. Moving towards best practice when using inverse probability  
566 of treatment weighting (IPTW) using the propensity score to estimate causal treatment  
567 effects in observational studies. *Stat Med* 34:3661–3679.
- 568 32. REMAP-CAP Investigators. 2021. Interleukin-6 Receptor Antagonists in Critically Ill  
569 Patients with Covid-19. *N Engl J Med* 384:1491–1502.
- 570 33. Marconi VC, Ramanan A V, de Bono S, Kartman CE, Krishnan V, Liao R, Piruzeli MLB,  
571 Goldman JD, Alatorre-Alexander J, de Cassia Pellegrini R, Estrada V, Som M, Cardoso A,  
572 Chakladar S, Crowe B, Reis P, Zhang X, Adams DH, Ely EW, Ahn M-Y, Akasbi M,  
573 Alatorre-Alexander J, Altclas JD, Ariel F, Ariza HA, Atkar C, Bertetti A, Bhattacharya M,  
574 Briones ML, Budhraj A, Burza A, Camacho Ortiz A, Caricchio R, Casas M, Cevoli Recio  
575 V, Choi WS, Cohen E, Comulada-Rivera A, Cook P, Cornejo Juarez DP, Daniel C, Degrecci  
576 Relvas LF, Dominguez Cherit JG, Ellerin T, Enikeev D, Erico Tanni Minamoto S, Estrada  
577 V, Fiss E, Furuichi M, Giovanni Luz K, Goldman JD, Gonzalez O, Gordeev I, Gruenewald

578 T, Hamamoto Sato VA, Heo EY, Heo JY, Hermida M, Hirai Y, Hutchinson D, Iastrebnier  
579 C, Ioachimescu O, Jain M, Juliani Souza Lima MP, Khan A, Kremer AE, Lawrie T,  
580 MacElwee M, Madhani-Lovely F, Malhotra V, Martínez Resendez MF, McKinnell J,  
581 Milligan P, Minelli C, Moran Rodriguez MA, Parody ML, Paulin P, Pellegrini R de C, Pemu  
582 P, Procopio Carvalho AC, Puoti M, Purow J, Ramesh M, Rea Neto A, Rea Neto A, Robinson  
583 P, Rodrigues C, Rojas Velasco G, Saraiva JFK, Scheinberg M, Schreiber S, Scublinsky D,  
584 Sevciovic Grumach A, Shawa I, Simon Campos J, Sofat N, Som M, Spinner CD, Sprinz E,  
585 Stienecker R, Suarez J, Tachikawa N, Tahir H, Tiffany B, Vishnevsky A, Westheimer  
586 Cavalcante A, Zirpe K. 2021. Efficacy and safety of baricitinib for the treatment of  
587 hospitalised adults with COVID-19 (COV-BARRIER): a randomised, double-blind,  
588 parallel-group, placebo-controlled phase 3 trial. *Lancet Respir Med* 9:1407–1418.

589 34. ACTIV-3/TICO LY-CoV555 Study Group. 2021. A Neutralizing Monoclonal Antibody  
590 for Hospitalized Patients with Covid-19. *N Engl J Med* 384:905–914.

591 35. National Institute of Health. 2021. [https://www.nih.gov/news-events/news-releases/nih-](https://www.nih.gov/news-events/news-releases/nih-sponsored-activ-3-clinical-trial-closes-enrollment-into-two-sub-studies)  
592 [sponsored-activ-3-clinical-trial-closes-enrollment-into-two-sub-studies](https://www.nih.gov/news-events/news-releases/nih-sponsored-activ-3-clinical-trial-closes-enrollment-into-two-sub-studies).

593 36. RECOVERY Collaborative Group. 2022. Casirivimab and imdevimab in patients admitted  
594 to hospital with COVID-19 (RECOVERY): a randomised, controlled, open-label, platform  
595 trial. *Lancet (London, England)* 399:665–676.

596 37. Argentinean National Administration of Drugs, Food, and Medical Technology (ANMAT).  
597 2022. [https://www.argentina.gob.ar/sites/default/files/dispo\\_0951-22\\_covifab\\_reins.pdf](https://www.argentina.gob.ar/sites/default/files/dispo_0951-22_covifab_reins.pdf).  
598  
599  
600

601 **Tables and Figures**

602

603

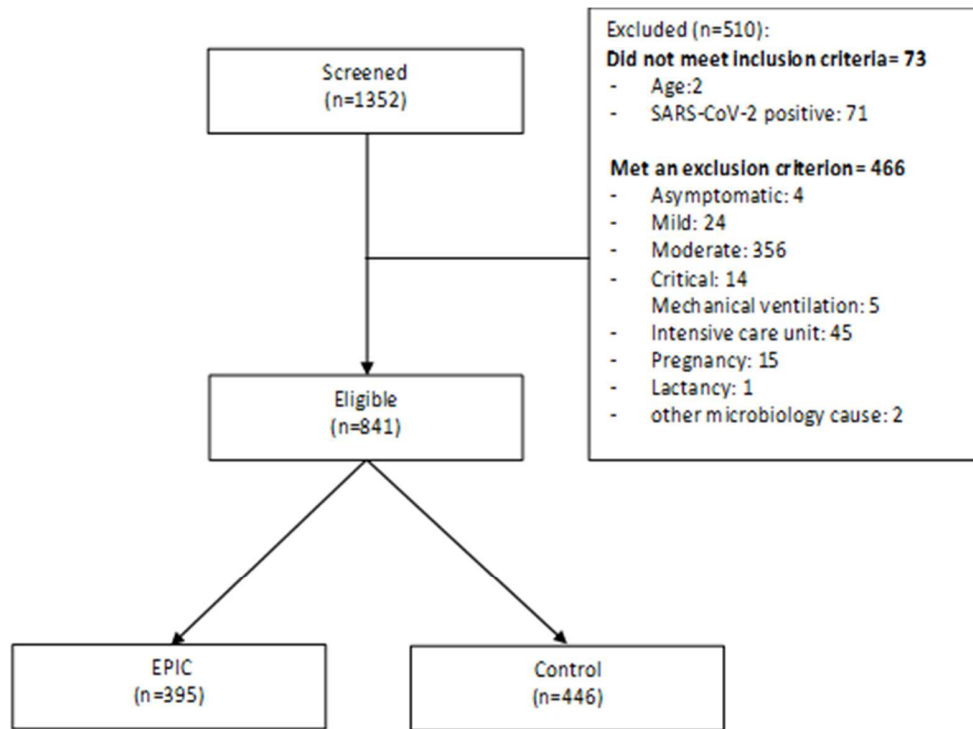

604

605 **FIG 1.** Cohort patient disposition

606

607

608

609

610

611

612

613

614

|                                                               | EPIC<br>(N=395) | Control<br>(N=446) | P value  |
|---------------------------------------------------------------|-----------------|--------------------|----------|
| <b>Characteristics</b>                                        |                 |                    |          |
| Age, years#                                                   | 57 (48-67)      | 59 (48-69)         | 0.1881†  |
| Male sex                                                      | 60.3 (238)      | 55.8 (249)         | 0.195    |
| <b>BMI**</b>                                                  |                 |                    |          |
| Median (Interquartile range)#                                 | 31.1 (28 - 36)  | 28.6 (26-33.2)     | <0.0001† |
| Normal                                                        | 10.9 (43)       | 12.6 (56)          | <0.001   |
| Overweight                                                    | 29.6 (117)      | 43.5 (194)         |          |
| Obesity                                                       | 59.5 (235)      | 39.5 (176)         |          |
| <b>Coexisting conditions</b>                                  |                 |                    |          |
| Charlson score                                                | 0 (0 - 2)       | 0 (0 - 2)          | 0.9982†  |
| Number of comorbidities#                                      | 2 (1 - 3)       | 1 (1 - 3)          | 0.0003†  |
| None                                                          | 9.1 (36)        | 15.0 (67)          | 0.009    |
| Hypertension                                                  | 57.7 (228)      | 54.3 (242)         | 0.313    |
| Diabetes                                                      | 28.1 (111)      | 24.7 (110)         | 0.258    |
| Obesity                                                       | 59.5 (235)      | 40.6 (181)         | <0.001   |
| Lung disease                                                  | 7.1 (28)        | 10.5 (47)          | 0.080    |
| <b>Baseline characteristics at time of hospital admission</b> |                 |                    |          |
| Days from symptoms onset to hospital admission#               | 7 (5 - 8)       | 6 (3 - 9)          | 0.0014†  |

|                                                                                               |                |                  |         |
|-----------------------------------------------------------------------------------------------|----------------|------------------|---------|
| <b>Hospitalized, requiring supplemental oxygen</b>                                            | 95.2 (376)     | 93.5 (418)       | 0.355   |
| <b>Hospitalized, receiving noninvasive mechanical ventilation or high-flow oxygen devices</b> | 0 (0)          | 0.7 (3)          | 0.252‡  |
| <b>Oxygen saturation on room at cohort entry</b>                                              | 92 (89 - 93)   | 90.5 (88 - 93)   | 0.0014† |
| <b>Respiratory frequency</b>                                                                  | 20 (20 - 21)   | 20 (20 - 22)     | 0.3096† |
| <b>Heart rate</b>                                                                             | 89 (80 - 100)  | 90 (78 - 102)    | 0.3703† |
| <b>Temperature</b>                                                                            | 36.3 (36 - 37) | 36.2 (36 - 36.9) | 0.4612† |
| <b>NEWS</b>                                                                                   |                |                  |         |
| Low                                                                                           | 36.0 (142)     | 28.3 (126)       | 0.006   |
| Medium-low                                                                                    | 19.8 (78)      | 19.3 (86)        |         |
| Medium                                                                                        | 34.7 (137)     | 35.4 (158)       |         |
| High                                                                                          | 9.6 (38)       | 17.0 (76)        |         |
| <b>Concomitant medications prior to cohort admission</b>                                      |                |                  |         |
| <b>ACE inhibitors / AIIRA</b>                                                                 | 45.3 (179)     | 47.3 (211)       | 0.563   |
| <b>NSAIDs</b>                                                                                 | 17.0 (67)      | 15.3 (68)        | 0.499   |
| <b>Immunosuppressors</b>                                                                      | 1.5 (6)        | 2.2 (10)         | 0.444   |
| <b>Statins</b>                                                                                | 8.9 (35)       | 8.1 (36)         | 0.681   |
| <b>Ivermectin</b>                                                                             | 6.3 (25)       | 3.4 (15)         | 0.044   |
| <b>Anticoagulants</b>                                                                         | 3.8 (15)       | 4.0 (18)         | 0.859   |
| <b>Corticosteroids</b>                                                                        | 8.6 (34)       | 11.0 (49)        | 0.248   |

615 \*\* Data was missing from 20 patients in Control Group

616 All data are % (n), except for: # Data are in median (interquartile range <sub>25:75</sub>)

617 All p values are for Chi2 except † for Wilcoxon rank-sum (Mann-Whitney) test, and ‡ for Fisher's exact test

618

619 **TABLE 1.** Demographic and clinical characteristics of the patients at baseline

|                                                      | <b>EPIC<br/>(N=395)</b> | <b>Control<br/>(N=446)</b> | <b>P value</b> |
|------------------------------------------------------|-------------------------|----------------------------|----------------|
| <b>Concomitant medication during hospitalization</b> |                         |                            |                |
| <b>None</b>                                          | 0 (0)                   | 0.7 (3)                    | 0.252‡         |
| <b>Corticoids</b>                                    | 100 (395)               | 91 (406)                   | <0.001         |
| <b>Heparin</b>                                       | 99.2 (392)              | 91.9 (410)                 | <0.001         |
| <b>Convalescent plasma</b>                           | 0 (0)                   | 71.1 (317)                 | <0.001         |
| <b>Monoclonal antibodies</b>                         | 0.3 (1)                 | 0 (0)                      | 0.470‡         |
| <b>Antibiotics</b>                                   | 69.4 (274)              | 72 (321)                   | 0.407          |
| <b>Ivermectin</b>                                    | 0 (0)                   | 0.2 (1)                    | 1.000‡         |
| <b>Tocilizumab</b>                                   | 0 (0)                   | 0.2 (1)                    | 1.000‡         |
| <b>Colchicine</b>                                    | 0 (0)                   | 0.2 (1)                    | 1.000‡         |
| <b>Remdesivir</b>                                    | 0.3 (1)                 | 0 (0)                      | 0.470‡         |

620 All data are % (n)

621 All P values are for Chi2 except † for Wilcoxon rank-sum (Mann-Whitney) test, and ‡ for Fisher's exact test

622

623 **TABLE 2. COVID-19 treatment intervention during hospitalization**

624

625

626

627

628

| Outcomes                                             | EPIC<br>(N=395) | Control<br>(N=446) | Estimator    | Crude                                  | IPTW†                                  | Doubly robust<br>adjustment‡           |
|------------------------------------------------------|-----------------|--------------------|--------------|----------------------------------------|----------------------------------------|----------------------------------------|
| <b>Primary outcome</b>                               |                 |                    |              |                                        |                                        |                                        |
| Overall mortality at day 28 since hospital admission | 15.7 (62)       | 21.5 (96)          | OR           | 0.68<br>(95%CI 0.48-0.97)<br>p 0.031   | 0.66<br>(95%CI 0.46 - 0.96)<br>p 0.030 | 0.65<br>(95%CI 0.44-0.98)<br>p 0.038   |
|                                                      |                 |                    | HR           | 0.72<br>(95%CI 0.52 - 0.99)<br>p 0.041 | 0.70<br>(95%CI 0.50-0.98)<br>p 0.037   | 0.72<br>(95%CI 0.50-1.01)<br>p 0.060   |
| <b>Secondary outcomes</b>                            |                 |                    |              |                                        |                                        |                                        |
| Overall mortality at day 21 since hospital admission | 14.9 (59)       | 19.3 (86)          | OR           | 0.73<br>(95%CI 0.51 - 1.05)<br>p 0.094 | 0.72<br>(95%CI 0.49 - 1.06)<br>p 0.093 | 0.73<br>(95%CI 0.48 - 1.10)<br>p 0.127 |
| Overall mortality at day 14 since hospital admission | 11.1 (44)       | 13.5 (60)          | OR           | 0.80<br>(95%CI 0.53 - 1.21)<br>p 0.304 | 0.81<br>(95%CI 0.52 - 1.26)<br>p 0.346 | 0.86<br>(95%CI 0.53 - 1.39)<br>p 0.533 |
| <b>Status in WHO 6-points ordinal scale:</b>         |                 |                    |              |                                        |                                        |                                        |
| <b>WHO 6-points ordinal scale at day 28</b>          |                 |                    | Proportional | 0.75<br>(95%CI 0.55 - 1.02)<br>p 0.07  | 0.74<br>(95%CI 0.54 - 1.03)<br>p 0.071 | 0.71<br>(95%CI 0.50 - 1)<br>p 0.054    |
| 1 Full restitution                                   | 76.5 (302)      | 71.2 (31)          | OR           |                                        |                                        |                                        |
| 2 Incomplete restitution                             | 2 (8)           | 4.5 (20)           |              |                                        |                                        |                                        |
| 3 Hospitalized NO oxygen                             | 1.3 (5)         | 0.4 (2)            |              |                                        |                                        |                                        |
| 4 Hospitalized with oxygen                           | 0.5 (2)         | 0.4 (2)            |              |                                        |                                        |                                        |
| 5 Invasive ventilatory                               | 4.1 (16)        | 1.8 (8)            |              |                                        |                                        |                                        |
| 6 Death                                              | 15.7 (62)       | 21.5 (96)          |              |                                        |                                        |                                        |
| <b>WHO 6-points ordinal scale at day 21</b>          |                 |                    | Proportional | 0.79<br>(95%CI 0.58 - 1.06)<br>p 0.117 | 0.79<br>(95%CI 0.57 - 1.08)<br>p 0.133 | 0.75<br>(95%CI 0.54 - 1.06)<br>p 0.101 |
| 1 Full restitution                                   | 74.2 (293)      | 69.3 (31)          | OR           |                                        |                                        |                                        |



|                                             |            |            |              |               |                  |                  |
|---------------------------------------------|------------|------------|--------------|---------------|------------------|------------------|
| 2 Incomplete restitution                    | 2 (8)      | 3.6 (16)   |              |               |                  |                  |
| 3 Hospitalized NO oxygen                    | 1.3 (5)    | 0.2 (1)    |              |               |                  |                  |
| 4 Hospitalized with oxygen                  | 2.8 (11)   | 4.3 (19)   |              |               |                  |                  |
| 5 Invasive ventilatory                      | 4.8 (19)   | 3.1 (14)   |              |               |                  |                  |
| 6 Death                                     | 14.9 (59)  | 19.3 (86)  |              |               |                  |                  |
| <b>WHO 6-points ordinal scale at day 14</b> |            |            | Proportional | 0.73          | 0.71 (95%CI 0.53 | 0.68 (95%CI 0.50 |
|                                             |            |            | OR           | (95%CI 0.55 - | - 0.95)          | - 0.94)          |
|                                             |            |            |              | 0.96)         | p 0.021          | p 0.019          |
| 1 Full restitution                          | 68.6 (271) | 60.3 (27)  |              | p 0.026       |                  |                  |
| 2 Incomplete restitution                    | 2.3 (9)    | 2.7 (12)   |              |               |                  |                  |
| 3 Hospitalized NO oxygen                    | 2.3 (9)    | 2.5 (11)   |              |               |                  |                  |
| 4 Hospitalized with oxygen                  | 7.1 (28)   | 12.3 (55)  |              |               |                  |                  |
| 5 Invasive ventilatory                      | 8.6 (34)   | 8.5 (38)   |              |               |                  |                  |
| 6 Death                                     | 11.1 (44)  | 13.5 (60)  |              |               |                  |                  |
| Proportion of adverse events                | 24.8 (98)  | 27.1 (121) | OR           | 0.86          | 0.82             | 0.81             |
|                                             |            |            |              | (95%CI 0.63 - | (95%CI 0.59 -    | (95%CI 0.57 -    |
|                                             |            |            |              | 1.18)         | 1.13)            | 1.16)            |
|                                             |            |            |              | p 0.349       | p 0.227          | p 0.257          |

629

630 All data are % (n), except for: #: Data are in median (interquartile range <sub>25:75</sub>)

631 OR: odds ratio, HR: hazard ratio, SHR:sub-hazard ratio

632 †IPTW ‡Doubly robust adjustment

633 **TABLE 3. Clinical Outcomes in EPIC and control groups**

634

635

636

637

638

639

|                                          | <b>EPIC<br/>(N=395)</b> | <b>Control<br/>(N=446)</b> |
|------------------------------------------|-------------------------|----------------------------|
| <b>Any patient with an adverse event</b> | 24.8 (98)               | 27.1 (121)                 |
| <b>Total of adverse events</b>           | 145                     | 168                        |
| <b>Type</b>                              |                         |                            |
| Mild AE                                  | 1.8 (7)                 | 0.2 (1)                    |
| Moderate AE                              | 2.3 (9)                 | 1.6 (7)                    |
| Severe AE                                | 12.9 (51)               | 12.1 (54)                  |
| Serious adverse events                   | 19.7 (78)               | 23.8 (106)                 |
| <b>Relatedness</b>                       |                         |                            |
| Not related AE                           | 35.2 (139)              | NA                         |
| Possible related AE                      | 0.8 (3)                 | NA                         |
| Probable related AE                      | 0.8 (3)                 | NA                         |
| <b>Association</b>                       |                         |                            |
| Associated to concomitant disease        | 22 (87)                 | 18.4 (82)                  |
| Associated to concomitant medication     | 0.5 (2)                 | 0                          |
| Associated to COVID-19                   | 33.4 (132)              | 35.6 (159)                 |

640 NA: Not applicable

641 **TABLE 4.** Review of safety outcomes

642

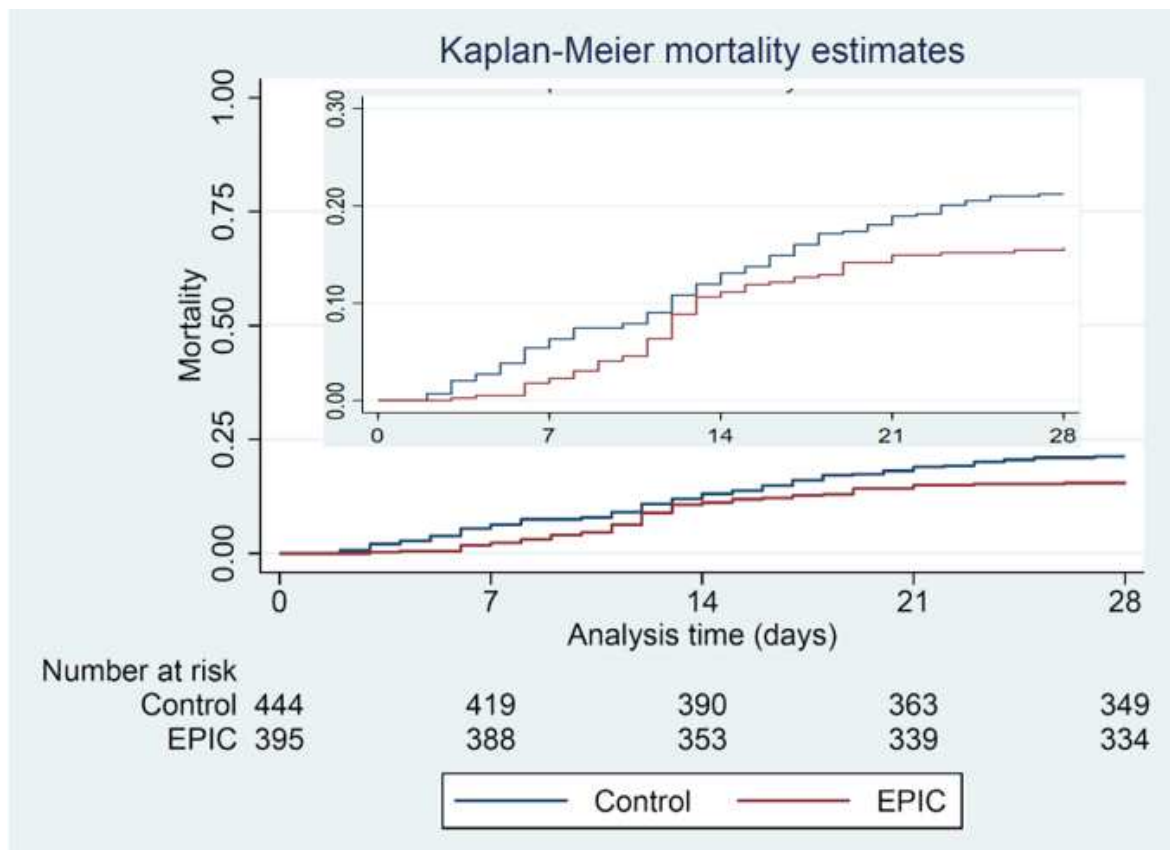

643

644

645 **FIG 2.** Overall mortality at day 28 since cohort admission

646

647

648
